# Supplementary material for: Personality, Social Factors, Brain Functioning, Familial Risk, and Trajectories of Alcohol Misuse in Adolescence
Source: PubMed Central journal article supplement (PMC11329879; doi:10.1001/jamanetworkopen.2024.25114), 2024-08-16
Supplement: jamanetwopen-e2425114-s002.pdf [file jamanetwopen-e2425114-s002.pdf]

\*First name, last name, and suffix (if applicable) are required and will appear in PubMed.

| <b>*Group Name(s): IMAGEN consortium</b> |                   |                              |                         |                                                                 |                                                 |                                                                |                                                                                                   |
|------------------------------------------|-------------------|------------------------------|-------------------------|-----------------------------------------------------------------|-------------------------------------------------|----------------------------------------------------------------|---------------------------------------------------------------------------------------------------|
| <b>*First Name and Middle Initial(s)</b> | <b>*Last Name</b> | <b>*Suffix (eg, Jr, III)</b> | <b>Academic Degrees</b> | <b>Institution</b>                                              | <b>Location (city, state/province, country)</b> | <b>Role or Contribution, eg, chair, principal investigator</b> | <b>Group (if more than 1 Group listed in the byline) and/or Subgroup (eg, Steering Committee)</b> |
| Trevor                                   | Robbin            |                              | PhD                     | Behavioural and Clinical Neuroscience Institute                 | Cambridge University, Cambridge, UK             | acquisition, analysis, or interpretation of data               |                                                                                                   |
| Jeffrey                                  | Dalley            |                              | PhD                     | Behavioural and Clinical Neuroscience Institute                 | Cambridge University, Cambridge, UK             | acquisition, analysis, or interpretation of data               |                                                                                                   |
| Naresh                                   | Subramaniam       |                              | PhD                     | Behavioural and Clinical Neuroscience Institute                 | Cambridge University, Cambridge, UK             | acquisition, analysis, or interpretation of data               |                                                                                                   |
| David                                    | Theobald          |                              | MSc                     | Behavioural and Clinical Neuroscience Institute                 | Cambridge University, Cambridge, UK             | acquisition, analysis, or interpretation of data               |                                                                                                   |
| Karl                                     | Mann              |                              | PhD                     | Central Institute of Mental Health                              | Mannheim, Germany                               | acquisition, analysis, or interpretation of data               |                                                                                                   |
| Christiane                               | Bach              |                              | MSc                     | Department of Child and Adolescent Psychiatry and Psychotherapy | Mannheim, Germany                               | acquisition, analysis, or interpretation of data               |                                                                                                   |
| Maren                                    | Struve            |                              | PhD                     | Central Institute of Mental Health                              | Mannheim, Germany                               | acquisition, analysis, or interpretation of data               |                                                                                                   |
| Marcella                                 | Rietschel         |                              | PhD                     | Central Institute of Mental Health                              | Mannheim, Germany                               | acquisition, analysis, or interpretation of data               |                                                                                                   |
| Rainer                                   | Spanagel          |                              | PhD                     | Central Institute of Mental Health                              | Mannheim, Germany                               | acquisition, analysis, or interpretation of data               |                                                                                                   |
| Mira                                     | Fauth-Bühler      |                              | PhD                     | Central Institute of Mental Health                              | Mannheim, Germany                               | acquisition, analysis, or interpretation of data               |                                                                                                   |
| Sabina                                   | Millenet          |                              | PhD                     | Department of Child and Adolescent Psychiatry and Psychotherapy | Mannheim, Germany                               | acquisition, analysis, or interpretation of data               |                                                                                                   |
| Yvonne                                   | Grimmer           |                              | PhD                     | Central Institute of Mental Health                              | Mannheim, Germany                               | acquisition, analysis, or interpretation of data               |                                                                                                   |
| Mark                                     | Lathrop           |                              | PhD                     | Centre National de Génotypage, Genoscope                        | Èvry, France                                    | acquisition, analysis, or interpretation of data               |                                                                                                   |
| Lisa                                     | Albrecht          |                              | MSc                     | Department of Psychiatry and Psychotherapy CCM, Charité         | Berlin, Germany                                 | acquisition, analysis, or interpretation of data               |                                                                                                   |
| Nikolay                                  | Ivanov            |                              |                         | Department of Psychiatry and Psychotherapy CCM, Charité         | Berlin, Germany                                 | acquisition, analysis, or interpretation of data               |                                                                                                   |
| Nicole                                   | Strache           |                              | PhD                     | Department of Psychiatry and Psychotherapy CCM, Charité         | Berlin, Germany                                 | acquisition, analysis, or interpretation of data               |                                                                                                   |
| Andreas                                  | Ströhle           |                              | PhD                     | Department of Psychiatry and Psychotherapy CCM, Charité         | Berlin, Germany                                 | acquisition, analysis, or interpretation of data               |                                                                                                   |
| Jan                                      | Reuter            |                              | PhD                     | Department of Psychiatry and Psychotherapy CCM, Charité         | Berlin, Germany                                 | acquisition, analysis, or interpretation of data               |                                                                                                   |
| Jürgen                                   | Gallinat          |                              | PhD                     | Department of Psychiatry and Psychotherapy CCM, Charité         | Berlin, Germany                                 | acquisition, analysis, or interpretation of data               |                                                                                                   |
| Isabel                                   | Gemmeke           |                              |                         | Department of Psychiatry and Psychotherapy CCM, Charité         | Berlin, Germany                                 | acquisition, analysis, or interpretation of data               |                                                                                                   |
| Alexander                                | Genauck           |                              | PhD                     | Department of Psychiatry and Psychotherapy CCM, Charité         | Berlin, Germany                                 | acquisition, analysis, or interpretation of data               |                                                                                                   |
| Caroline                                 | Parchetka         |                              | PhD                     | Department of Psychiatry and Psychotherapy CCM, Charité         | Berlin, Germany                                 | acquisition, analysis, or interpretation of data               |                                                                                                   |
| Katharina                                | Weiß              |                              |                         | Department of Psychiatry and Psychotherapy CCM, Charité         | Berlin, Germany                                 | acquisition, analysis, or interpretation of data               |                                                                                                   |
| Johann                                   | Kruschwitz        |                              | PhD                     | Department of Psychiatry and Psychotherapy CCM, Charité         | Berlin, Germany                                 | acquisition, analysis, or interpretation of data               |                                                                                                   |
| Bianca                                   | Raffaelli         |                              | MD                      | Department of Psychiatry and Psychotherapy CCM, Charité         | Berlin, Germany                                 | acquisition, analysis, or interpretation of data               |                                                                                                   |
| Alexis                                   | Barbot            |                              | PhD                     | Commissariat à l'Énergie Atomique                               | Fontenay-aux-Roses, France                      | acquisition, analysis, or interpretation of data               |                                                                                                   |
| Benjamin                                 | Thyreau           |                              |                         | Commissariat à l'Énergie Atomique                               | Fontenay-aux-Roses, France                      | acquisition, analysis, or interpretation of data               |                                                                                                   |
| Yannick                                  | Schwartz          |                              |                         | Commissariat à l'Énergie Atomique                               | Fontenay-aux-Roses, France                      | acquisition, analysis, or interpretation of data               |                                                                                                   |
| Christophe                               | Lalanne           |                              |                         | Commissariat à l'Énergie Atomique                               | Fontenay-aux-Roses, France                      | acquisition, analysis, or interpretation of data               |                                                                                                   |

## Supplemental Online Content: Nonauthor Collaborators

\*First name, last name, and suffix (if applicable) are required and will appear in PubMed.

| *First Name and Middle Initial(s)      | *Last Name       | *Suffix (eg, Jr, III) | Academic Degrees | Institution                                                                  | Location (city, state/province, country)     | Role or Contribution, eg, chair, principal investigator | Group (if more than 1 Group listed in the byline) and/or Subgroup (eg, Steering Committee) |
|----------------------------------------|------------------|-----------------------|------------------|------------------------------------------------------------------------------|----------------------------------------------|---------------------------------------------------------|--------------------------------------------------------------------------------------------|
| Vincent Frouin <sup>25</sup> ,<br>John | Frouin<br>Rogers |                       | PhD              | Commissariat à l'Energie Atomique<br>Delosis                                 | Fontenay-aux-Roses, France<br>Twickenham, UK | acquisition, analysis, or interpretation of data        |                                                                                            |
| James                                  | Ireland          |                       |                  | Delosis                                                                      | Twickenham, UK                               | acquisition, analysis, or interpretation of data        |                                                                                            |
| Dirk                                   | Lanzerath        |                       | PhD              | Deutsches Referenzzentrum für Ethik                                          | Bonn, Germany                                | acquisition, analysis, or interpretation of data        |                                                                                            |
| Jianfeng                               | Feng             |                       | PhD              | Fudan University                                                             | Shanghai, China                              | acquisition, analysis, or interpretation of data        |                                                                                            |
| Zuleima                                | Bricaud          |                       |                  | InstitutNational de la Santé et de la Recherche Médicale                     | Gif-sur-Yvette, France                       | acquisition, analysis, or interpretation of data        |                                                                                            |
| Fanny                                  | Gollier Briand   |                       |                  | InstitutNational de la Santé et de la Recherche Médicale                     | Gif-sur-Yvette, France                       | acquisition, analysis, or interpretation of data        |                                                                                            |
| Hervé                                  | Lemaître         |                       | PhD              | Group d'Imagerie Neurofonctionnelle, Institut de Maladies Neurodégénératives | Bordeaux, France                             | acquisition, analysis, or interpretation of data        |                                                                                            |
| Ruben                                  | Miranda          |                       |                  | InstitutNational de la Santé et de la Recherche Médicale                     | Gif-sur-Yvette, France                       | acquisition, analysis, or interpretation of data        |                                                                                            |
| Jessica                                | Massicotte       |                       |                  | InstitutNational de la Santé et de la Recherche Médicale                     | Gif-sur-Yvette, France                       | acquisition, analysis, or interpretation of data        |                                                                                            |
| Helene                                 | Vulser           |                       |                  | InstitutNational de la Santé et de la Recherche Médicale                     | Gif-sur-Yvette, France                       | acquisition, analysis, or interpretation of data        |                                                                                            |
| Jani                                   | Pentillä         |                       | PhD              | InstitutNational de la Santé et de la Recherche Médicale                     | Gif-sur-Yvette, France                       | acquisition, analysis, or interpretation of data        |                                                                                            |
| Irina                                  | Filippi          |                       |                  | InstitutNational de la Santé et de la Recherche Médicale                     | Gif-sur-Yvette, France                       | acquisition, analysis, or interpretation of data        |                                                                                            |
| André                                  | Galinowski       |                       |                  | InstitutNational de la Santé et de la Recherche Médicale                     | Gif-sur-Yvette, France                       | acquisition, analysis, or interpretation of data        |                                                                                            |
| Pauline                                | Bezivin          |                       |                  | InstitutNational de la Santé et de la Recherche Médicale                     | Gif-sur-Yvette, France                       | acquisition, analysis, or interpretation of data        |                                                                                            |
| Anna                                   | Cattrell         |                       | PhD              | Social, Genetic andDevelopmental Psychiatry Centre,                          | London, UK                                   | acquisition, analysis, or interpretation of data        |                                                                                            |
| Tianye                                 | Jia              |                       | PhD              | Social, Genetic andDevelopmental Psychiatry Centre,                          | London, UK                                   | acquisition, analysis, or interpretation of data        |                                                                                            |
| Helen                                  | Werts            |                       |                  | Social, Genetic andDevelopmental Psychiatry Centre,                          | London, UK                                   | acquisition, analysis, or interpretation of data        |                                                                                            |
| Lauren                                 | Topper           |                       |                  | Social, Genetic andDevelopmental Psychiatry Centre,                          | London, UK                                   | acquisition, analysis, or interpretation of data        |                                                                                            |
| Laurence                               | Reed             |                       | PhD              | Social, Genetic andDevelopmental Psychiatry Centre,                          | London, UK                                   | acquisition, analysis, or interpretation of data        |                                                                                            |
| Chris                                  | Andrew           |                       |                  | Social, Genetic andDevelopmental Psychiatry Centre,                          | London, UK                                   | acquisition, analysis, or interpretation of data        |                                                                                            |
| Catherine                              | Mallik           |                       |                  | Social, Genetic andDevelopmental Psychiatry Centre,                          | London, UK                                   | acquisition, analysis, or interpretation of data        |                                                                                            |
| Barbara                                | Ruggeri          |                       | PhD              | Social, Genetic andDevelopmental Psychiatry Centre,                          | London, UK                                   | acquisition, analysis, or interpretation of data        |                                                                                            |
| Gareth                                 | Barker           |                       | PhD              | Social, Genetic andDevelopmental Psychiatry Centre,                          | London, UK                                   | acquisition, analysis, or interpretation of data        |                                                                                            |
| Charlotte                              | Nymberg          |                       | PhD              | Social, Genetic andDevelopmental Psychiatry Centre,                          | London, UK                                   | acquisition, analysis, or interpretation of data        |                                                                                            |
| Patricia J.                            | Conrod           |                       | PhD              | Social, Genetic andDevelopmental Psychiatry Centre,                          | London, UK                                   | acquisition, analysis, or interpretation of data        |                                                                                            |
| Lindsay                                | Smith            |                       | PhD              | Social, Genetic andDevelopmental Psychiatry Centre,                          | London, UK                                   | acquisition, analysis, or interpretation of data        |                                                                                            |
| Eva                                    | Loth             |                       | PhD              | Social, Genetic andDevelopmental Psychiatry Centre,                          | London, UK                                   | acquisition, analysis, or interpretation of data        |                                                                                            |
| Stephanie                              | Havatzias        |                       |                  | Social, Genetic andDevelopmental Psychiatry Centre,                          | London, UK                                   | acquisition, analysis, or interpretation of data        |                                                                                            |
| Emily                                  | Kitson           |                       |                  | Social, Genetic andDevelopmental Psychiatry Centre,                          | London, UK                                   | acquisition, analysis, or interpretation of data        |                                                                                            |
| Alice                                  | Robinson         |                       |                  | Social, Genetic andDevelopmental Psychiatry Centre,                          | London, UK                                   | acquisition, analysis, or interpretation of data        |                                                                                            |

## Supplemental Online Content: Nonauthor Collaborators

\*First name, last name, and suffix (if applicable) are required and will appear in PubMed.

| *First Name and Middle Initial(s) | *Last Name    | *Suffix (eg, Jr, III) | Academic Degrees | Institution                                                                     | Location (city, state/province, country) | Role or Contribution, eg, chair, principal investigator | Group (if more than 1 Group listed in the byline) and/or Subgroup (eg, Steering Committee) |
|-----------------------------------|---------------|-----------------------|------------------|---------------------------------------------------------------------------------|------------------------------------------|---------------------------------------------------------|--------------------------------------------------------------------------------------------|
| Deborah                           | Hall          |                       |                  | Social, Genetic andDevelopmental Psychiatry Centre,                             | London, UK                               | acquisition, analysis, or interpretation of data        |                                                                                            |
| Chiara                            | Rubino        |                       | BSc              | Social, Genetic andDevelopmental Psychiatry Centre,                             | London, UK                               | acquisition, analysis, or interpretation of data        |                                                                                            |
| Hannah                            | Wright        |                       | PhD              | Social, Genetic andDevelopmental Psychiatry Centre,                             | London, UK                               | acquisition, analysis, or interpretation of data        |                                                                                            |
| Kerstin                           | Stueber       |                       |                  | Social, Genetic andDevelopmental Psychiatry Centre,                             | London, UK                               | acquisition, analysis, or interpretation of data        |                                                                                            |
| Eanna                             | Hanratty      |                       |                  | Social, Genetic andDevelopmental Psychiatry Centre,                             | London, UK                               | acquisition, analysis, or interpretation of data        |                                                                                            |
| Eleanor                           | Kennedy       |                       |                  | Social, Genetic andDevelopmental Psychiatry Centre,                             | London, UK                               | acquisition, analysis, or interpretation of data        |                                                                                            |
| Fabiana Mesquita                  | de Carvahlo   |                       | PhD              | Social, Genetic andDevelopmental Psychiatry Centre,                             | London, UK                               | acquisition, analysis, or interpretation of data        |                                                                                            |
| Argyris                           | Stringaris    |                       | PhD, MD          | Social, Genetic andDevelopmental Psychiatry Centre,                             | London, UK                               | acquisition, analysis, or interpretation of data        |                                                                                            |
| Alex                              | Ing           |                       | PhD              | Social, Genetic andDevelopmental Psychiatry Centre,                             | London, UK                               | acquisition, analysis, or interpretation of data        |                                                                                            |
| Gabriel                           | Robert        |                       | PhD, MD          | Social, Genetic andDevelopmental Psychiatry Centre,                             | London, UK                               | acquisition, analysis, or interpretation of data        |                                                                                            |
| Christine                         | Macare        |                       | PhD              | Social, Genetic andDevelopmental Psychiatry Centre,                             | London, UK                               | acquisition, analysis, or interpretation of data        |                                                                                            |
| Bing                              | Xu            |                       |                  | Social, Genetic andDevelopmental Psychiatry Centre,                             | London, UK                               | acquisition, analysis, or interpretation of data        |                                                                                            |
| Tao                               | Yu            |                       | PhD, MD          | Social, Genetic andDevelopmental Psychiatry Centre,                             | London, UK                               | acquisition, analysis, or interpretation of data        |                                                                                            |
| Erin                              | Burke Quinlan |                       | PhD              | Social, Genetic andDevelopmental Psychiatry Centre,                             | London, UK                               | acquisition, analysis, or interpretation of data        |                                                                                            |
| Patrick                           | Constant      |                       |                  | Pertimm                                                                         | Paris, France                            | acquisition, analysis, or interpretation of data        |                                                                                            |
| Semiha                            | Aydin         |                       |                  | Physikalisch-TechnischeBundesanstalt (PTB), Braunschweig                        | Berlin, Germany                          | acquisition, analysis, or interpretation of data        |                                                                                            |
| Ruediger                          | Brühl         |                       | PhD              | Physikalisch-TechnischeBundesanstalt (PTB), Braunschweig                        | Berlin, Germany                          | acquisition, analysis, or interpretation of data        |                                                                                            |
| Albrecht                          | Ihlenfeld     |                       |                  | Physikalisch-TechnischeBundesanstalt (PTB), Braunschweig                        | Berlin, Germany                          | acquisition, analysis, or interpretation of data        |                                                                                            |
| Bernadeta                         | Walaszek      |                       |                  | Physikalisch-TechnischeBundesanstalt (PTB), Braunschweig                        | Berlin, Germany                          | acquisition, analysis, or interpretation of data        |                                                                                            |
| Bernd                             | Ittermann     |                       | PhD              | Physikalisch-TechnischeBundesanstalt (PTB), Braunschweig                        | Berlin, Germany                          | acquisition, analysis, or interpretation of data        |                                                                                            |
| Michael                           | Smolka        |                       | PhD              | Department of Psychiatry and NeuroimagingCenter, Technische Universität Dresden | Dresden, Germany                         | acquisition, analysis, or interpretation of data        |                                                                                            |
| Thomas                            | Hübner        |                       | PhD              | Department of Psychiatry and NeuroimagingCenter, Technische Universität Dresden | Dresden, Germany                         | acquisition, analysis, or interpretation of data        |                                                                                            |
| Kathrin                           | Müller        |                       |                  | Department of Psychiatry and NeuroimagingCenter, Technische Universität Dresden | Dresden, Germany                         | acquisition, analysis, or interpretation of data        |                                                                                            |
| Stephan                           | Ripke         |                       | PhD              | Department of Psychiatry and NeuroimagingCenter, Technische Universität Dresden | Dresden, Germany                         | acquisition, analysis, or interpretation of data        |                                                                                            |
| Sarah                             | Jurk          |                       |                  | Department of Psychiatry and NeuroimagingCenter, Technische Universität Dresden | Dresden, Germany                         | acquisition, analysis, or interpretation of data        |                                                                                            |
| Eva                               | Mennigen      |                       |                  | Department of Psychiatry and NeuroimagingCenter, Technische Universität Dresden | Dresden, Germany                         | acquisition, analysis, or interpretation of data        |                                                                                            |
| Dirk                              | Schmidt       |                       |                  | Department of Psychiatry and NeuroimagingCenter, Technische Universität Dresden | Dresden, Germany                         | acquisition, analysis, or interpretation of data        |                                                                                            |
| Nora                              | Vetter        |                       | PhD              | Department of Psychiatry and NeuroimagingCenter, Technische Universität Dresden | Dresden, Germany                         | acquisition, analysis, or interpretation of data        |                                                                                            |
| Veronika                          | Ziesch        |                       |                  | Department of Psychiatry and NeuroimagingCenter, Technische Universität Dresden | Dresden, Germany                         | acquisition, analysis, or interpretation of data        |                                                                                            |
| Juliane H.                        | Fröhner       |                       | MSc              | Department of Psychiatry and NeuroimagingCenter, Technische Universität Dresden | Dresden, Germany                         | acquisition, analysis, or interpretation of data        |                                                                                            |
| Daniel                            | Carter        |                       |                  | Trinity College Dublin                                                          | Dublin, Ireland                          | acquisition, analysis, or interpretation of data        |                                                                                            |

## Supplemental Online Content: Nonauthor Collaborators

\*First name, last name, and suffix (if applicable) are required and will appear in PubMed.

| *First Name and Middle Initial(s) | *Last Name | *Suffix (eg, Jr, III) | Academic Degrees | Institution                                       | Location (city, state/province, country) | Role or Contribution, eg, chair, principal investigator | Group (if more than 1 Group listed in the byline) and/or Subgroup (eg, Steering Committee) |
|-----------------------------------|------------|-----------------------|------------------|---------------------------------------------------|------------------------------------------|---------------------------------------------------------|--------------------------------------------------------------------------------------------|
| Susanne                           | O'Driscoll |                       |                  | Trinity College Dublin                            | Dublin, Ireland                          | acquisition, analysis, or interpretation of data        |                                                                                            |
| Emily                             | Walsh      |                       |                  | Trinity College Dublin                            | Dublin, Ireland                          | acquisition, analysis, or interpretation of data        |                                                                                            |
| Maria Leonora Fatir               | Agan       |                       | MSc              | Trinity College Dublin                            | Dublin, Ireland                          | acquisition, analysis, or interpretation of data        |                                                                                            |
| Mairead                           | McMorrow   |                       |                  | Trinity College Dublin                            | Dublin, Ireland                          | acquisition, analysis, or interpretation of data        |                                                                                            |
| Sinead                            | Nugent     |                       | PhD              | Trinity College Dublin                            | Dublin, Ireland                          | acquisition, analysis, or interpretation of data        |                                                                                            |
| Colm                              | Connolly   |                       |                  | Trinity College Dublin                            | Dublin, Ireland                          | acquisition, analysis, or interpretation of data        |                                                                                            |
| Eoin                              | Dooley     |                       | MSc              | Trinity College Dublin                            | Dublin, Ireland                          | acquisition, analysis, or interpretation of data        |                                                                                            |
| Clodagh                           | Cremen     |                       | PhD              | Trinity College Dublin                            | Dublin, Ireland                          | acquisition, analysis, or interpretation of data        |                                                                                            |
| Jennifer                          | Jones      |                       | PhD              | University College Dublin                         | Dublin, Ireland                          | acquisition, analysis, or interpretation of data        |                                                                                            |
| John                              | O'Keefe    |                       | BA               | University College Dublin                         | Dublin, Ireland                          | acquisition, analysis, or interpretation of data        |                                                                                            |
| Martin                            | O'Connor   |                       |                  | University College Dublin                         | Dublin, Ireland                          | acquisition, analysis, or interpretation of data        |                                                                                            |
| Jean-Baptiste                     | Poline     |                       | PhD              | 34 McGill University and University of California | Montréal, Canada and Berlin, Germany     | acquisition, analysis, or interpretation of data        |                                                                                            |
| Uli                               | Bromberg   |                       | PhD              | University Medical Centre Hamburg-Eppendorf       | Hamburg, Germany                         | acquisition, analysis, or interpretation of data        |                                                                                            |
| Tahmine                           | Fadai      |                       | MD               | University Medical Centre Hamburg-Eppendorf       | Hamburg, Germany                         | acquisition, analysis, or interpretation of data        |                                                                                            |
| Juliana                           | Yacubian   |                       | PhD              | University Medical Centre Hamburg-Eppendorf       | Hamburg, Germany                         | acquisition, analysis, or interpretation of data        |                                                                                            |
| Sophia                            | Schneider  |                       | PhD              | University Medical Centre Hamburg-Eppendorf       | Hamburg, Germany                         | acquisition, analysis, or interpretation of data        |                                                                                            |
| Maria                             | Lobatcheva |                       |                  | University Medical Centre Hamburg-Eppendorf       | Hamburg, Germany                         | acquisition, analysis, or interpretation of data        |                                                                                            |
| Claire                            | Lawrence   |                       | PhD              | University of Nottingham, University Park,        | Nottingham, UK                           | acquisition, analysis, or interpretation of data        |                                                                                            |
| Craig                             | Newman     |                       |                  | University of Nottingham, University Park,        | Nottingham, UK                           | acquisition, analysis, or interpretation of data        |                                                                                            |
| Kay                               | Head       |                       |                  | University of Nottingham, University Park,        | Nottingham, UK                           | acquisition, analysis, or interpretation of data        |                                                                                            |
| Alicia                            | Stedman    |                       |                  | University of Nottingham, University Park,        | Nottingham, UK                           | acquisition, analysis, or interpretation of data        |                                                                                            |
| Nadja                             | Heym       |                       | PhD              | University of Nottingham, University Park,        | Nottingham, UK                           | acquisition, analysis, or interpretation of data        |                                                                                            |
| Mehri                             | Kaviani    |                       | PhD              | University of Nottingham, University Park,        | Nottingham, UK                           | acquisition, analysis, or interpretation of data        |                                                                                            |
| Tomáš                             | Paus       |                       | PhD              | University of Toronto                             | Toronto, ON, Canada                      | acquisition, analysis, or interpretation of data        |                                                                                            |
| Dai                               | Stephens   |                       | PhD              | University of Sussex                              | Brighton, UK                             | acquisition, analysis, or interpretation of data        |                                                                                            |
| Zdenka                            | Pausova    |                       | PhD              | University of Toronto                             | Toronto, ON, Canada                      | acquisition, analysis, or interpretation of data        |                                                                                            |
| Amir                              | Tahmasebi  |                       | PhD              | University of Toronto                             | Toronto, ON, Canada                      | acquisition, analysis, or interpretation of data        |                                                                                            |
