# Supplementary material for: Personality, Social Factors, Brain Functioning, Familial Risk, and Trajectories of Alcohol Misuse in Adolescence
Source: PubMed Central journal article supplement (PMC11329879; doi:10.1001/jamanetworkopen.2024.25114), 2024-08-16
Supplement: jamanetwopen-e2425114-s003.pdf [file jamanetwopen-e2425114-s003.pdf]

## Data Sharing Statement

Tschorn. Personality, Social Factors, Brain Functioning, and Familial Risk—Trajectories of Alcohol Misuse in Adolescence. *JAMA Netw Open*. Published August 16, 2024.  
doi:10.1001/jamanetworkopen.2024.25114

### Data

**Data available:** No
